# Supplementary material for: Convenient chirality transfer from organics to titania: construction and optical properties
Source: Royal Society of Chemistry journal article supplement (doi:10.1039/c8ra02926a), 2018-01-01
Supplement: c8ra02926a1.pdf [file c8ra02926a1.pdf]

Supporting Information

**Convenient Chirality Transfer from Organics to Titania:  
Construction and Optical Property**

Xin-Ling Liu, Ken Murakami, Hiroyuki Matsukizono, Tsunega, Seiji and Ren-Hua Jin\*

Department of Material and Life Chemistry, Kanagawa University,  
3-2-7 Rokkakubashi, Yokohama 221-8686, Japan

\*Corresponding author, E-mail: [rhjin@kanagwa-u.ac.jp](mailto:rhjin@kanagwa-u.ac.jp)

## Synthesis of achiral TiO<sub>2</sub>

### 1. Synthesis of crystalline PEI template

0.474 g PEI powders were dissolved in 20 mL H<sub>2</sub>O by heating around 80 °C with stirring. Then the hot PEI solution was placed at room temperature to form a suspension, from which white precipitate (i.e., crystalline PEI) was collected by centrifugation and further washing with H<sub>2</sub>O three times. The as-obtained crystalline PEI above was dispersed in 15 mL H<sub>2</sub>O.

### 2. Synthesis of achiral PEI@TiO<sub>2</sub> hybrids

The TiO<sub>2</sub> source solution was prepared as follows: 6 mL titanium bislactates (abbreviated as TiLact, the commercial name is TC310 from Matsumoto Chemical Co. Japan), 6 mL ammonia (1 mol/L), and 8 mL H<sub>2</sub>O was mixed with stirring for 30 minutes. Then the PEI-containing suspension above was added into the TiO<sub>2</sub> source solution. After stirring for 2 hours at room temperature, white precipitate (i.e., achiral PEI@TiO<sub>2</sub>) was collected by centrifugation, washing with H<sub>2</sub>O and acetone, and drying under vacuum.

### 3. Synthesis of achiral aTiO<sub>2</sub> by calcination

The as-formed PEI@TiO<sub>2</sub> above was further calcinated at 500 °C (or 800 °C) for 1h under air, which led to achiral aTiO<sub>2</sub>-500 (or TiO<sub>2</sub>-800). The XRD patterns and SEM images of aTiO<sub>2</sub>-500 and aTiO<sub>2</sub>-800 are shown in Figure S1 and S2, respectively.

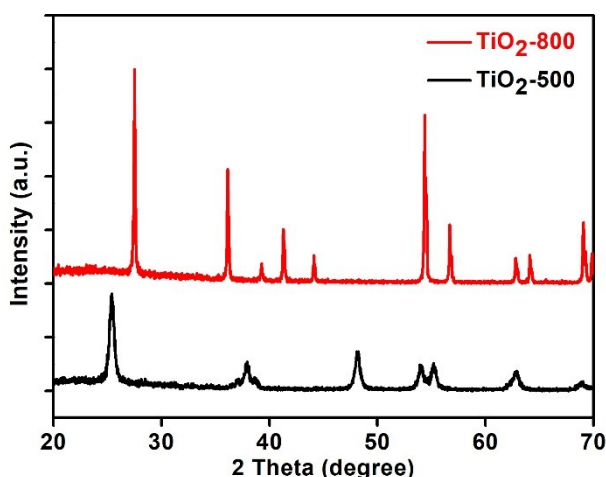

**Figure S1.** XRD pattern for the achiral aTiO<sub>2</sub> after calcination at 500 °C (black line) and 800 °C (red line).

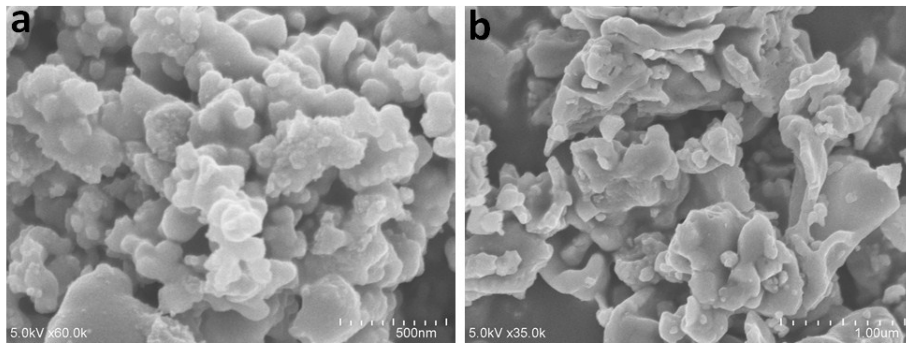

**Figure S2.** SEM images for the achial  $\text{aTiO}_2$  after calcination at a) 500 °C and b) 800 °C.
